# Supplementary figures and images for: Histidine-enriched multifunctional peptide vectors with enhanced cellular uptake and endosomal escape for gene delivery
Source: Royal Society of Chemistry journal article supplement (doi:10.1039/c6tb02862d), 2016-11-11

Figure S1 RP-HPLC of peptide vectors

P-01

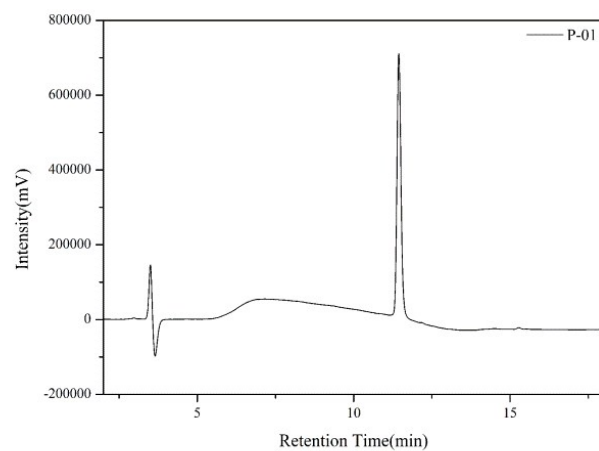

P-02

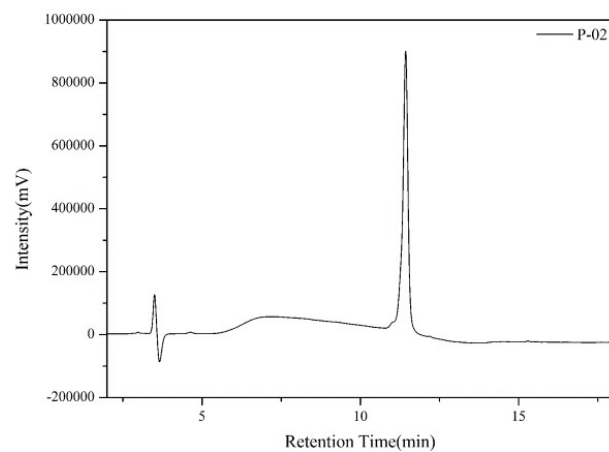

P-03

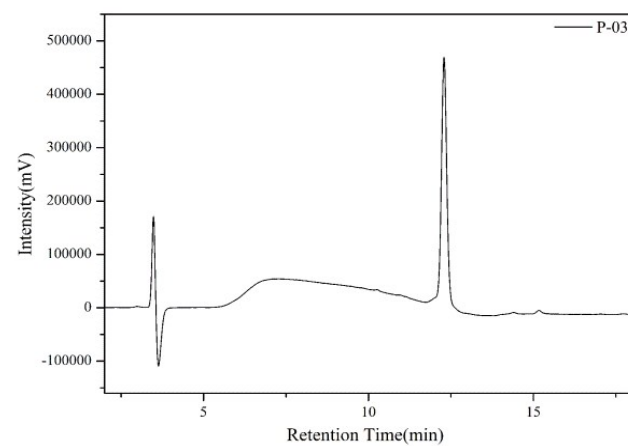

P-04

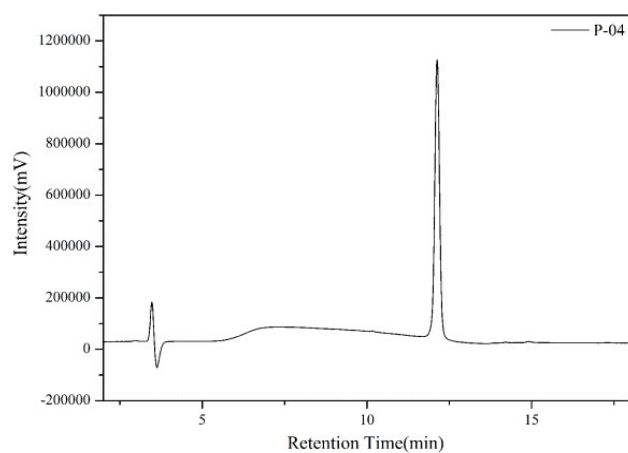

P-05

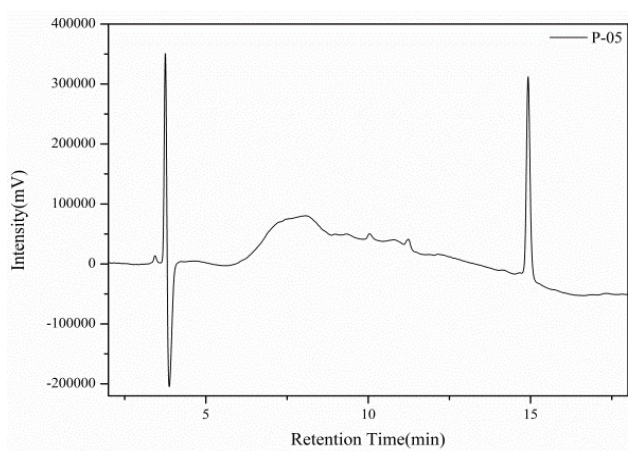

P-06

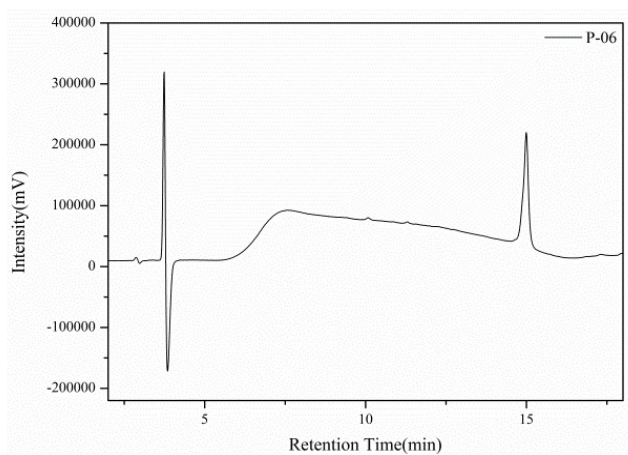

Figure S2 MALDI-TOF mass of peptide vectors

P-01

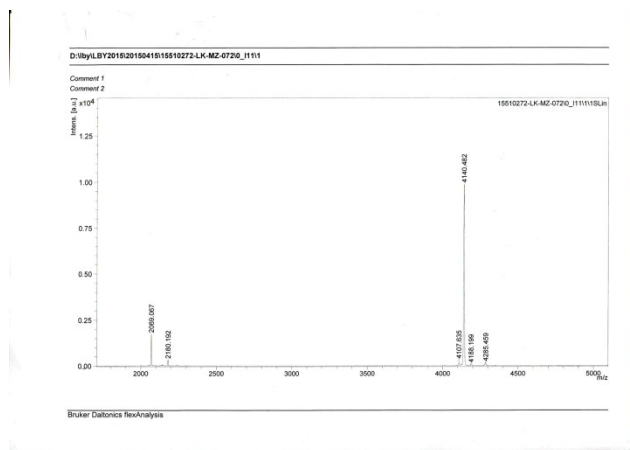

P-02

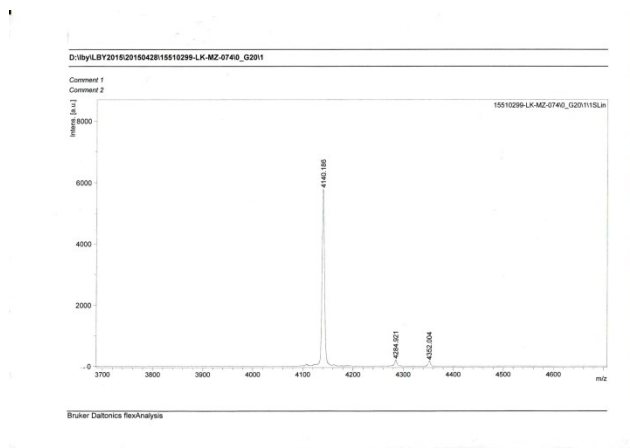

P-03

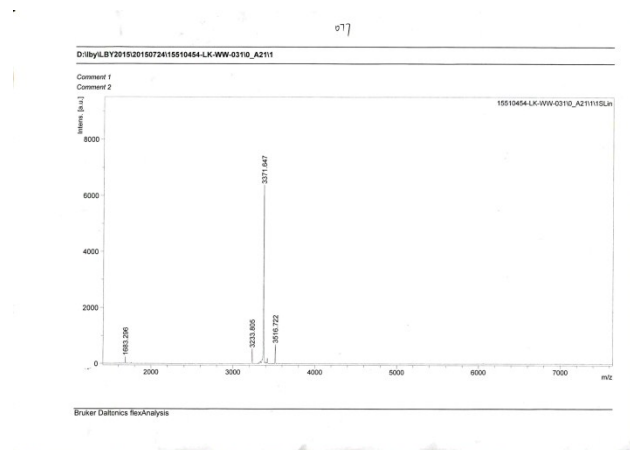

P-04

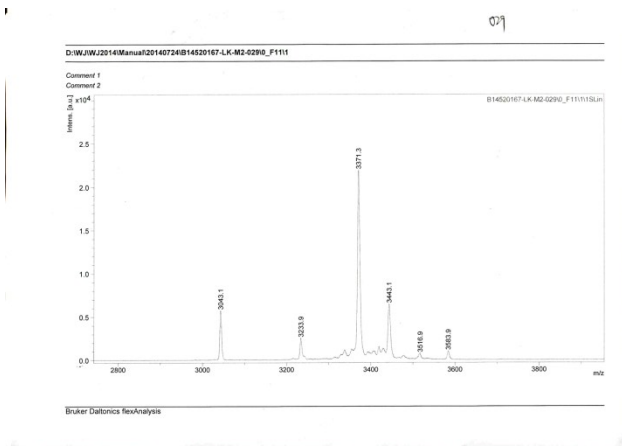

P-05

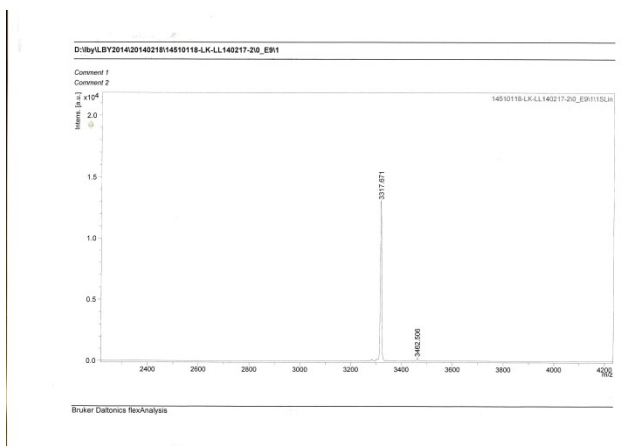

P-06

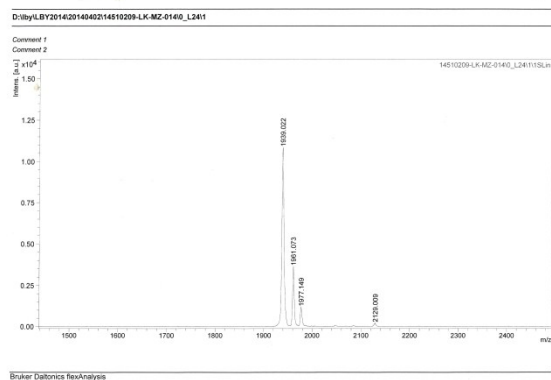

Supplement: c6tb02862d1.pdf [file c6tb02862d1.pdf]
